# Supplementary material
Source: publisher figshare collection journal article supplement (https://tandf.figshare.com/ndownloader/files/13273934)
Supplement: Supplementary file 1 [file 13273934]

Species,Low elevation limit (m),Upper elevation limit (m),Elevational breadth (m),Number of sites where mist-netted,Number of mist-netted individuals,Relative abundance (number mist netted per mist net hour),Mass (g)
Ceyx azureus,230,910,680,6,24,0.003399329,14.69
Meliphaga montana,258,1360,1102,9,33,0.003362742,28.52
Timeliopsis fulvigula,1360,2420,1060,7,16,0.002269587,17.65
Melilestes megarhynchus,143,1790,1647,13,84,0.00624079,43.32
Crateroscelis murina,143,1660,1517,13,84,0.00560392,15.23
Crateroscelis nigrorufa,1660,1900,240,3,66,0.021851431,15.42
Sericornis spilodera,258,910,652,8,30,0.003101549,11.10
Sericornis perspicillatus,1790,2420,630,6,26,0.004211222,8.09
Sericornis arfakianus,1090,1660,570,4,20,0.004659484,8.22
Melanocharis nigra,230,1090,860,11,166,0.013531704,13.02
Melanocharis longicauda,1360,1790,430,4,18,0.004164167,13.86
Toxorhamphus novaeguineae,143,910,767,10,68,0.00569696,11.92
Toxorhamphus poliopterus,610,2420,1810,15,265,0.017202742,11.05
Oedistoma iliolophus,230,1790,1560,14,153,0.009579839,11.53
Ptilorrhoa leucosticta,1510,2550,1040,9,26,0.003055617,48.25
Rhagologus leucostigma,1090,2850,1760,10,31,0.002908695,23.79
Colluricincla megarhyncha,143,1790,1647,15,186,0.01109133,34.47
Pachycephala soror,1000,1900,900,6,33,0.005565635,24.60
Pachycephala hyperythra,390,1360,970,8,54,0.005881782,28.45
Myiagra alecto,143,610,467,4,12,0.002640956,22.78
Arses insularis,143,618,475,5,14,0.002303655,18.25
Symposiachrus axillaris,750,2280,1530,12,35,0.002883285,14.64
Symposiachrus guttula,143,1000,857,11,159,0.012330835,16.75
Symposiachrus manadensis,143,618,475,7,25,0.002970286,21.31
Chaetorhynchus papuensis,303,2150,1847,14,43,0.002927942,40.19
Rhipidura leucothorax,143,610,467,4,16,0.003480301,16.50
Rhipidura threnothorax,230,808,578,8,34,0.003432544,16.81
Rhipidura atra,610,2710,2100,15,171,0.011219521,11.38
Rhipidura hyperythra,610,1090,480,3,12,0.003660804,10.75
Amalocichla incerta,1360,2420,1060,8,63,0.00771523,31.43
Pachycephalopsis poliosoma,750,1790,1040,9,184,0.019683155,33.54
Eugerygone rubra,1790,2850,1060,6,12,0.002121568,7.85
Heteromyias albispecularis,1510,2550,1040,9,96,0.010965665,34.60
Poecilodryas hypoleuca,143,750,607,6,29,0.004088389,18.14
Peneothello bimaculata,390,910,520,6,120,0.017474836,24.39
Peneothello cyanus,1510,2710,1200,9,98,0.010952441,24.66
Tregellasia leucops,618,1510,892,8,37,0.004205879,16.73
